# Supplementary material
Source: publisher site journal article supplement (https://www.dovepress.com/get_supplementary_file.php?f=503137.xlsx)
Supplement: Supplementary file 1 [file get_supplementary_file.php]

## Sheet: Sheet1
Supplementary Table 1 Specific univariable and mutivariable logistic regression analyses to examine the effect of low skeletal muscle mass* on colorectal polyps and different pathological types.
Variables	Univariate analysis		Multivariate analysis
	Crode OR(95% CI)	p value	Adjust OR(95% CI)	p value
Colorectal polyp
Age(year)	1.049(1.044~1.055)	<0.001	1.053(1.047~1.060)	<0.001
Sex, male vs. female	2.164(1.933~2.426)	<0.001	1.877(1.640~2.149)	<0.001
Current or ex-smoking, yes vs. no	1.798(1.604~2.015)	<0.001	1.494(1.307~1.709)	<0.001
Heavy drinking, yes vs. no	1.615(1.396~1.868)	<0.001	1.072(0.912~1.259)	0.399
Postcholecystestomy, yes vs. no	1.255(0.801~1.953)	0.316
Overweight, yes vs. no	1.618(1.452~1.802)	<0.001	1.267(1.124~1.428)	<0.001
Hypertension, yes vs. no	1.705(1.523~1.910)	<0.001	1.107(0.976~1.255)	0.114
Diabetes mellitus, yes vs. no	2.108(1.771~2.511)	<0.001	1.314(1.092~1.583)	0.004
Dyslipidemia, yes vs. no	1.262(1.132~1.407)	<0.001	1.025(0.912~1.154)	0.675
Hyperuricemia, yes vs. no	1.239(1.096~1.400)	<0.001	0.995(0.868~1.141)	0.945
Low SMI, yes vs. no	0.765(0.657~0.891)	<0.001	0.810(0.683~0.960)	0.015
Conventional adenoma
Age(year)	1.054(1.047~1.061)	<0.001	1.057(1.049~1.064)	<0.001
Sex, male vs. female	1.712(1.486~1.977)	<0.001	1.801(1.552~2.093)	<0.001
Current or ex-smoking, yes vs. no	1.246(1.084~1.430)	0.002	1.058(0.898~1.246)	0.499
Heavy drinking, yes vs. no	1.363(1.145~1.617)	<0.001	1.107(0.919~1.329)	0.281
Postcholecystestomy, yes vs. no	0.890(0.478~1.542)	0.694
Overweight, yes vs. no	1.386(1.215~1.581)	<0.001	1.154(1.001~1.332)	0.049
Hypertension, yes vs. no	1.592(1.390~1.823)	<0.001	1.030(0.886~1.196)	0.697
Diabetes mellitus, yes vs. no	1.744(1.431~2.115)	<0.001	1.138(0.924~1.395)	0.219
Dyslipidemia, yes vs. no	1.200(1.048~1.375)	0.008	1.071(0.928~1.236)	0.35
Hyperuricemia, yes vs. no	1.024(0.878~1.191)	0.761
Low skeletal muscle mass, yes vs. no	0.839(0.691~1.013)	0.071	0.836(0.677~1.027)	0.092
Inflammatory lesion
Age(year)	1.026(1.016~1.036)	<0.001	1.027(1.017~1.038)	<0.001
Sex, male vs. female	1.469(1.173~1.851)	<0.001	1.086(0.829~1.422)	0.55
Current or ex-smoking, yes vs. no	1.721(1.391~2.126)	<0.001	1.777(1.430~2.204)	<0.001
Heavy drinking, yes vs. no	1.310(0.992~1.708)	0.051	0.984(0.731~1.310)	0.916
Postcholecystestomy, yes vs. no	1.401(0.583~2.856)	0.399
Overweight, yes vs. no	1.435(1.164~1.767)	<0.001	1.203(0.966~1.496)	0.098
Hypertension, yes vs. no	1.367(1.099~1.694)	0.005	1.065(0.842~1.342)	0.595
Diabetes mellitus, yes vs. no	1.783(1.321~2.370)	<0.001	1.364(0.999~1.835)	0.045
Dyslipidemia, yes vs. no	1.039(0.839~1.292)	0.729
Hyperuricemia, yes vs. no	1.189(0.935~1.502)	0.151
Low skeletal muscle mass, yes vs. no	0.616(0.429~0.860)	0.006	0.633(0.434~0.898)	0.013
Serrated lesion
Age(year)	1.011(1.003~1.018)	0.004	1.012(1.004~1.020)	0.003
Sex, male vs. female	2.137(1.789~2.566)	<0.001	1.662(1.355~2.044)	<0.001
Current or ex-smoking, yes vs. no	1.896(1.618~2.219)	<0.001	1.504(1.259~1.799)	<0.001
Heavy drinking, yes vs. no	1.645(1.351~1.993)	<0.001	1.160(0.941~1.425)	0.161
Postcholecystestomy, yes vs. no	1.496(0.803~2.597)	0.175
Overweight, yes vs. no	1.516(1.298~1.771)	<0.001	1.291(1.099~1.515)	0.002
Hypertension, yes vs. no	1.230(1.043~1.447)	0.013	0.992(0.829~1.183)	0.925
Diabetes mellitus, yes vs. no	1.638(1.298~2.050)	<0.001	1.333(1.047~1.685)	0.018
Dyslipidemia, yes vs. no	1.266(1.077~1.492)	0.005	1.045(0.883~1.239)	0.612
Hyperuricemia, yes vs. no	1.392(1.171~1.650)	<0.001	1.123(0.934~1.346)	0.213
Low skeletal muscle mass, yes vs. no	0.862(0.683~1.078)	0.202
Advanced adenoma
Age(year)	1.052(1.037~1.067)	<0.001	1.048(1.033~1.064)	<0.001
Sex, male vs. female	1.747(1.243~2.504)	0.002	1.722(1.218~2.479)	0.003
Current or ex-smoking, yes vs. no	1.192(0.857~1.640)	0.287
Heavy drinking, yes vs. no	1.150(0.747~1.707)	0.507
Postcholecystestomy, yes vs. no	0.424(0.024~1.925)	0.395
Overweight, yes vs. no	1.468(1.079~1.990)	0.014	1.144(0.829~1.575)	0.41
Hypertension, yes vs. no	1.844(1.353~2.503)	<0.001	1.208(0.869~1.672)	0.257
Diabetes mellitus, yes vs. no	2.787(1.899~3.997)	<0.001	1.872(1.257~2.728)	0.001
Dyslipidemia, yes vs. no	1.610(1.155~2.282)	0.006	1.413(1.007~2.013)	0.05
Hyperuricemia, yes vs. no	0.837(0.566~1.204)	0.353
Low skeletal muscle mass, yes vs. no	0.824(0.504~1.277)	0.41
Advanced neoplasm
Age(year)	1.052(1.037~1.066)	<0.001	1.048(1.033~1.063)	<0.001
Sex, male vs. female	1.747(1.248~2.494)	0.002	1.713(1.217~2.457)	0.003
Current or ex-smoking, yes vs. no	1.215(0.877~1.664)	0.232
Heavy drinking, yes vs. no	1.217(0.802~1.788)	0.335
Postcholecystestomy, yes vs. no	0.414(0.023~1.880)	0.382
Overweight, yes vs. no	1.441(1.063~1.947)	0.018	1.118(0.812~1.534)	0.491
Hypertension, yes vs. no	1.813(1.334~2.454)	<0.001	1.180(0.851~1.628)	0.316
Diabetes mellitus, yes vs. no	2.900(1.992~4.132)	<0.001	1.947(1.319~2.819)	<0.001
Dyslipidemia, yes vs. no	1.664(1.196~2.355)	0.003	1.455(1.039~2.071)	0.033
Hyperuricemia, yes vs. no	0.812(0.550~1.168)	0.277
Low skeletal muscle mass, yes vs. no	0.802(0.491~1.242)	0.348
*Take normal skeletal muscle mass group as the reference.
Supplementary Table 2. Specific univariable and mutivariable logistic regression analyses for colorectal polyps and different pathological types, with skeletal muscle mass index as a continuous variable in male.
Variables	Univariate analysis		Multivariate analysis
	Crode OR(95% CI)	p value	Adjust OR(95% CI)	p value
Colorectal polyp
Age(year)	1.052(1.045~1.060)	<0.001	1.053(1.045~1.060)	<0.001
Current or ex-smoking, yes vs. no	1.322(1.162~1.504)	<0.001	1.489(1.301~1.705)	<0.001
Heavy drinking, yes vs. no	1.225(1.050~1.429)	0.01	1.056(0.896~1.244)	0.519
Postcholecystestomy, yes vs. no	1.426(0.775~2.656)	0.255
Overweight, yes vs. no	1.371(1.205~1.561)	<0.001	1.188(1.006~1.403)	0.043
Hypertension, yes vs. no	1.536(1.341~1.761)	<0.001	1.145(0.988~1.327)	0.073
Diabetes mellitus, yes vs. no	1.865(1.519~2.294)	<0.001	1.286(1.035~1.600)	0.023
Dyslipidemia, yes vs. no	1.135(0.988~1.303)	0.073	1.063(0.918~1.232)	0.415
Hyperuricemia, yes vs. no	1.005(0.876~1.153)	0.95
Skeletal muscle mass index(kg/m2)	1.157(1.057~1.267)	0.002	1.157(1.031~1.302)	0.014
Conventional adenoma
Age(year)	1.054( 1.046~1.062)	<0.001	1.052( 1.043~1.060)	<0.001
Current or ex-smoking, yes vs. no	0.961( 0.823~1.122)	0.616
Heavy drinking, yes vs. no	1.143(0.952~1.368)	0.147
Postcholecystestomy, yes vs. no	1.276(0.609~2.483)	0.492
Overweight, yes vs. no	1.178(1.010~1.375)	0.037	1.131(0.957~1.336)	0.148
Hypertension, yes vs. no	1.553(1.325~1.819)	<0.001	1.172(0.990~1.386)	0.064
Diabetes mellitus, yes vs. no	1.751(1.400~2.181)	<0.001	1.271(1.005~1.601)	0.044
Dyslipidemia, yes vs. no	1.154(0.977~1.367)	0.094	1.186(0.997~1.413)	0.0559
Hyperuricemia, yes vs. no	0.848(0.716~1.002)	0.055	0.885(0.742~1.054)	0.172
Skeletal muscle mass index(kg/m2)	0.983(0.882~1.092)	0.747
Inflammatory lesion
Age(year)	1.020(1.008~1.032)	<0.001	1.025(1.013~1.037)	<0.001
Current or ex-smoking, yes vs. no	1.631(1.275~2.092)	<0.001	1.713(1.336~2.202)	<0.001
Heavy drinking, yes vs. no	1.133(0.845~1.501)	0.392
Postcholecystestomy, yes vs. no	0.646(0.105~2.118)	0.548
Overweight, yes vs. no	1.278(0.999~1.634)	0.051	1.115(0.833~1.492)	0.4631
Hypertension, yes vs. no	1.193(0.922~1.536)	0.174
Diabetes mellitus, yes vs. no	1.259(0.864~1.786)	0.213
Dyslipidemia, yes vs. no	0.968(0.745~1.265)	0.807
Hyperuricemia, yes vs. no	1.144(0.880~1.479)	0.31
Skeletal muscle mass index(kg/m2)	1.202(1.026~1.399)	0.019	1.237(1.058~1.444)	0.007
Serrated lesion
Age(year)	1.008(1.000~1.017)	0.0577	1.011(1.001~1.020)	0.0227
Current or ex-smoking, yes vs. no	1.476(1.236~1.764)	<0.001	1.502(1.255~1.798)	<0.001
Heavy drinking, yes vs. no	1.284(1.044~1.571)	0.0164	1.139(0.921~1.403)	0.225
Postcholecystestomy, yes vs. no	1.553(0.694~3.136)	0.247
Overweight, yes vs. no	1.382(1.157~1.651)	<0.001	1.160(0.934~1.439)	0.179
Hypertension, yes vs. no	1.067(0.884~1.285)	0.494
Diabetes mellitus, yes vs. no	1.391(1.067~1.794)	0.0127	1.269(0.967~1.650)	0.0799
Dyslipidemia, yes vs. no	1.095(0.905~1.331)	0.354
Hyperuricemia, yes vs. no	1.163(0.964~1.400)	0.112
Skeletal muscle mass index(kg/m2)	1.270(1.128~1.433)	<0.001	1.288(1.143~1.456)	<0.001
Advanced adenoma
Age(year)	1.046(1.029~1.063)	<0.001	1.044(1.026~1.061)	<0.001
Current or ex-smoking, yes vs. no	0.932(0.652~1.326)	0.697
Heavy drinking, yes vs. no	0.965(0.619~1.456)	0.87
Postcholecystestomy, yes vs. no	0.700(0.039~3.256)	0.725
Overweight, yes vs. no	1.233(0.867~1.753)	0.242
Hypertension, yes vs. no	1.557(1.088~2.116)	0.015	1.167(0.802~1.690)	0.415
Diabetes mellitus, yes vs. no	2.290(1.462~3.477)	<0.001	1.681(1.059~2.590)	0.022
Dyslipidemia, yes vs. no	1.711(1.135~2.662)	0.013	1.711(1.129~2.674)	0.014
Hyperuricemia, yes vs. no	0.744(0.493~1.095)	0.144
Skeletal muscle mass index(kg/m2)	1.095(0.862~1.355)	0.434
Advanced neoplasm
Age(year)	1.046(1.029~1.063)	<0.001	1.043(1.026~1.060)	<0.001
Current or ex-smoking, yes vs. no	0.953(0.670~1.350)	0.788
Heavy drinking, yes vs. no	1.026(0.667~1.533)	0.904
Postcholecystestomy, yes vs. no	0.683(0.038~3.178)	0.708
Overweight, yes vs. no	1.216(0.857~1.721)	0.271
Hypertension, yes vs. no	1.542(1.082~2.188)	0.0156	1.151(0.794~1.660)	0.454
Diabetes mellitus, yes vs. no	2.441(1.579~3.671)	<0.001	1.796(1.146~2.740)	0.008
Dyslipidemia, yes vs. no	1.764(1.172~2.741)	0.009	1.752(1.158~2.736)	0.01
Hyperuricemia, yes vs. no	0.720(0.478~1.059)	0.104
Skeletal muscle mass index(kg/m2)	1.092(0.862~1.349)	0.444
Supplementary Table 3. Specific univariable and mutivariable logistic regression analyses for colorectal polyps and different pathological types, with skeletal muscle mass index as a continuous variable in female.
Variables	Univariate analysis		Multivariate analysis
	Crode OR(95% CI)	p value	Adjust OR(95% CI)	p value
Colorectal polyp
Age(year)	1.056(1.046~1.067)	<0.001	1.054(1.043~1.065)	<0.001
Current or ex-smoking, yes vs. no	1.271(0.394~3.592)	0.663
Heavy drinking, yes vs. no	1.370(0.513~3.362)	0.504
Postcholecystestomy, yes vs. no	1.328(0.655~2.569)	0.411
Overweight, yes vs. no	1.507(1.211~1.872)	<0.001	1.173(0.932~1.473)	0.1715
Hypertension, yes vs. no	1.720(1.387~2.130)	<0.001	0.988(0.772~1.259)	0.9203
Diabetes mellitus, yes vs. no	2.306(1.642~3.231)	<0.001	1.406(0.982~2.007)	0.061
Dyslipidemia, yes vs. no	1.132(0.937~1.367)	0.199
Hyperuricemia, yes vs. no	0.806(0.551~1.156)	0.254
Skeletal muscle mass index(kg/m2)	1.103(0.942~1.293)	0.22367
Conventional adenoma
Age(year)	1.061(1.048~1.074)	<0.001	1.067(1.053~1.082)	<0.001
Current or ex-smoking, yes vs. no	1.494(0.339~4.736)	0.536
Heavy drinking, yes vs. no	0.660(0.105~2.301)	0.578
Postcholecystestomy, yes vs. no	0.505(0.121~1.411)	0.258
Overweight, yes vs. no	1.529(1.162~1.998)	0.002	1.260(0.944~1.670)	0.112
Hypertension, yes vs. no	1.394(1.057~1.825)	0.017	0.745(0.547~1.008)	0.059
Diabetes mellitus, yes vs. no	1.355(0.860~2.063)	0.172
Dyslipidemia, yes vs. no	1.035(0.813~1.318)	0.782
Hyperuricemia, yes vs. no	1.018(0.634~1.568)	0.939
Skeletal muscle mass index(kg/m2)	1.145(0.935~1.402)	0.191
Inflammatory lesion
Age(year)	1.043(1.023~1.062)	<0.001	1.032(1.012~1.052)	0.002
Heavy drinking, yes vs. no	2.073(0.327~7.306)	0.332
Postcholecystestomy, yes vs. no	2.899(0.977~6.953)	0.03	2.840(0.946~6.921)	0.036
Overweight, yes vs. no	1.560(1.012~2.356)	0.038	1.177(0.749~1.810)	0.469
Hypertension, yes vs. no	1.716(1.126~2.572)	0.01	1.051(0.652~1.669)	0.83697
Diabetes mellitus, yes vs. no	3.796(2.253~6.162)	<0.001	2.842(1.636~4.779)	<0.001
Dyslipidemia, yes vs. no	1.017(0.691~1.499)	0.934
Hyperuricemia, yes vs. no	0.566(0.198~1.274)	0.222
Skeletal muscle mass index(kg/m2)	0.993(0.716~1.371)	0.966
Serrated lesion
Age(year)	1.026(1.011~1.042)	<0.001	1.022(1.005~1.038)	0.008
Current or ex-smoking, yes vs. no	0.833(0.046~4.182)	0.861
Heavy drinking, yes vs. no	2.080(0.482~6.271)	0.246
Postcholecystestomy, yes vs. no	1.802(0.610~4.285)	0.227
Overweight, yes vs. no	1.110(0.758~1.593)	0.581
Hypertension, yes vs. no	1.440(1.008~2.029)	0.04	1.097(0.739~1.612)	0.64
Diabetes mellitus, yes vs. no	2.202(1.328~3.504)	0.001	1.780(1.049~2.908)	0.026
Dyslipidemia, yes vs. no	1.288(0.939~1.777)	0.119
Hyperuricemia, yes vs. no	0.915(0.473~1.617)	0.776
Skeletal muscle mass index(kg/m2)	0.977(0.748~1.272)	0.861
Advanced adenoma
Age(year)	1.075(1.044~1.108)	<0.001	1.066(1.034~1.100)	<0.001
Overweight, yes vs. no	1.735(0.884~3.253)	0.095	1.174(0.582~2.261)	0.641
Hypertension, yes vs. no	2.518(1.342~4.630)	0.003	1.249(0.623~2.465)	0.525
Diabetes mellitus, yes vs. no	4.321(1.984~8.647)	<0.001	2.416(1.069~5.067)	0.025
Dyslipidemia, yes vs. no	1.131(0.617~2.101)	0.692
Hyperuricemia, yes vs. no	0.283(0.016~1.310)	0.213
Skeletal muscle mass index(kg/m2)	0.863(0.514~1.437)	0.575
Advanced neoplasm
Age(year)	1.076(1.045~1.108)	<0.001	1.067(1.035~1.100)	<0.001
Overweight, yes vs. no	1.677(0.856~3.130)	0.115
Hypertension, yes vs. no	2.419(1.295~4.423)	0.005	1.187(0.596~2.327)	0.62
Diabetes mellitus, yes vs. no	4.192(1.928~8.363)	<0.001	2.326(1.032~4.860)	0.031
Dyslipidemia, yes vs. no	1.179(0.648~2.181)	0.592
Hyperuricemia, yes vs. no	0.276(0.016~1.277)	0.204
Skeletal muscle mass index(kg/m2)	0.858(0.514~1.421)	0.557
Supplementary Table 4. Spearman test for variables of interest.
Variables		Corr	p value
Male
SMI	Age	-0.075	<0.001
SMI	BMI	0.729	<0.001
Age	BMI	0.045	0.006
Female
SMI	Age	0.053	0.015
SMI	BMI	0.666	<0.001
Age	BMI	0.288	<0.001
Notes: Corr, correlation coeffitient; SMI, skeletal muscle mass; BMI, body mass index.
Supplementary Table 5. Specific univariable and mutivariable logistic regression analyses for colorectal polyps and different pathological types, with skeletal muscle mass index as a continuous variable in postmenopausal female.
Variables	Univariate analysis		Multivariate analysis
	Crode OR(95% CI)	p value	Adjust OR(95% CI)	p value
Colorectal polyp
Age(year)	1.041(1.020-1.062)	<0.001	1.038(1.017-1.060)	<0.001
Heavy drinking, yes vs. no	1.229(0.352-4.114)	0.735
Postcholecystestomy, yes vs. no	1.481(0.540-4.064)	0.437
Overweight, yes vs. no	1.231(0.902-1.678)	0.189
Hypertension, yes vs. no	1.053(0.791-1.402)	0.722
Diabetes mellitus, yes vs. no	1.711(1.155-2.537)	0.007	1.555(1.043-2.319)	0.03
Dyslipidemia, yes vs. no	1.081(0.807-1.449)	0.603
Hyperuricemia, yes vs. no	0.975(0.419-2.174)	0.95
Skeletal muscle mass index(kg/m2)	1.073(0.842-1.368)	0.571
Conventional adenoma
Age(year)	1.053(1.028-1.079)	<0.001
Heavy drinking, yes vs. no	0.825(0.125-3.240)	0.807
Postcholecystestomy, yes vs. no	0.243(0.013-1.210)	0.172
Overweight, yes vs. no	1.128(0.776-1.625)	0.522
Hypertension, yes vs. no	0.807(0.567-1.141)	0.229
Diabetes mellitus, yes vs. no	0.936(0.566-1.497)	0.789
Dyslipidemia, yes vs. no	0.885(0.627-1.255)	0.49
Hyperuricemia, yes vs. no	1.444(0.553-3.377)	0.418
Skeletal muscle mass index(kg/m2)	0.916(0.684-1.226)	0.556
Inflammatory lesion
Age(year)	1.032(0.995-1.070)	0.089	1.020(0.982-1.059)	0.298
Heavy drinking, yes vs. no	2.761(0.415-11.021)	0.201
Postcholecystestomy, yes vs. no	4.281(1.168-12.742)	0.014	5.870(1.581-17.829)	0.003
Overweight, yes vs. no	1.463(0.835-2.506)	0.172
Hypertension, yes vs. no	1.236(0.728-2.087)	0.428
Diabetes mellitus, yes vs. no	3.496(1.949-6.125)	<0.001	3.813(2.109-6.752)	<0.001
Dyslipidemia, yes vs. no	1.124(0.654-1.981)	0.678
Hyperuricemia, yes vs. no	1.713(0.397-5.136)	0.393
Skeletal muscle mass index(kg/m2)	1.105(0.705-1.732)	0.662
Serrated lesion
Age(year)	1.001(0.970-1.033)	0.934
Heavy drinking, yes vs. no	0.800(0.043-4.251)	0.832
Postcholecystestomy, yes vs. no	1.886(0.426-5.994)	0.329
Overweight, yes vs. no	1.108(0.676-1.774)	0.675
Hypertension, yes vs. no	1.134(0.724-1.765)	0.58
Diabetes mellitus, yes vs. no	1.689(0.953-2.875)	0.062	1.667(0.938-2.846)	0.07
Dyslipidemia, yes vs. no	1.519(0.950-2.495)	0.089	1.482(0.924-2.437)	0.111
Hyperuricemia, yes vs. no	0.686(0.109-2.372)	0.613
Skeletal muscle mass index(kg/m2)	1.233(0.843-1.802)	0.28
